# Supplementary material for: Synthesis of cationic β-cyclodextrin functionalized silver nanoparticles and their drug-loading applications
Source: Royal Society of Chemistry journal article supplement (doi:10.1039/d2ra08216k), 2023-01-01
Supplement: d2ra08216k1.pdf [file d2ra08216k1.pdf]

## Supplementary Information

### **Synthesis of cationic $\beta$ -cyclodextrin functionalized silver nanoparticles and their drug-loading applications**

Ke Yang,<sup>a,b</sup> Laichun Luo,<sup>a</sup> Junfeng Liu,<sup>\*a,b</sup> Meilin Li,<sup>a,b</sup> Tanfang Xu,<sup>a,b</sup> Junfeng Zan<sup>a</sup>

a College of Pharmacy, Hubei University of Chinese Medicine; Hubei University of Chinese Medicine, Wuhan 430065, P. R. China

b Key Laboratory of Traditional Chinese Medicine Resource and Compound Prescription, Ministry of Education, Hubei University of Chinese Medicine, Wuhan 430065, P. R. China

e-mail: [\\*liujf456@hotmail.com](mailto:*liujf456@hotmail.com) or [1105787683@qq.com](mailto:1105787683@qq.com), mobile: +86-15629118698.

### 1. Synthesis of Diaminopropane- $\beta$ -cyclodextrin (DAP- $\beta$ -CD):

Two-step synthesis of DAP- $\beta$ -CD<sup>1,2</sup>: Briefly, 50.0 g of  $\beta$ -CD was dissolved in 500 mL of a 0.4 M NaOH solution (0~5 °C), then 35.0 g of TsCl was added in batches within 5 min and stirred for another 30 min below 5 °C, after removing the unreacted TsCl by filtration, the filtrate was neutralized to pH 8 with 3 M HCl and stirred for 1 h. The resultant precipitates were filtered off, washed three times with water, and finally dried under vacuum at 40 °C. 4.0 g of Ts- $\beta$ -CD was dissolved in 20 mL of 1,3-propanediamine and stirred at 80°C for 4 h. Then poured into 250 mL of EtOH. The precipitates were collected by filtration and were washed by EtOH thoroughly. The solid was dried under vacuum at 40 °C to obtain the DAP- $\beta$ -CD. (yield: 94%). <sup>1</sup>H-NMR (600 MHz, D<sub>2</sub>O):  $\delta$ (ppm)5.09-5.04 (m,7H),  $\delta$ 3.98-3.82 (m, 26H),  $\delta$ 3.67-3.55 (m, 14H),  $\delta$ 3.46-3.41 (t, 1H),  $\delta$ 3.11-3.03 (m, 1H),  $\delta$ 2.87-2.60 (m, 7H),  $\delta$ 1.73-1.62 (m, 2H); <sup>13</sup>C-NMR (151 MHz, D<sub>2</sub>O):  $\delta$ (ppm)101.84, 83.65, 81.12, 73.10, 72.04, 71.83, 60.26, 49.44, 46.43, 37.86, 30.25. FT-IR: (KBr, cm<sup>-1</sup>):  $\nu$  3377, 2929, 1639, 1570, 1156, 1080, 1032, 945, 580. ESI-MS (*m/z*): 1190.44 (Calcd.) and 1191.45 (Found) for [M + H]<sup>+</sup>

### 2. Synthesis of cationic- $\beta$ -cyclodextrin (C- $\beta$ -CD):

C- $\beta$ -CD was synthesized as follows: 0.6 g of EPTAC was dissolved in 10 mL of DMSO, subsequently, 4.5 g of DAP- $\beta$ -CD was dissolved in 10 mL of DMSO solution and added to the above EPTAC solution, and then reacted at 80 °C for 4 h. Then poured into 250 mL of EtOH. The precipitates were collected by filtration and were washed by EtOH thoroughly. The solid was dried under vacuum at 40 °C to obtain the C- $\beta$ -CD. (yield: 82%). <sup>1</sup>H-NMR (600 MHz, D<sub>2</sub>O):  $\delta$ (ppm)5.10-5.01 (m,7H),  $\delta$ 4.09-3.73 (m, 26H),  $\delta$ 3.67-3.55 (m, 14H),  $\delta$ 3.47-3.35 (m, 2H),  $\delta$ 3.31-3.13 (s, 5H),  $\delta$ 3.09-3.03 (d, 2H)  $\delta$ 2.89-2.55 (m, 8H),  $\delta$ 1.83-1.60 (m, 2H); <sup>13</sup>C NMR (151 MHz, D<sub>2</sub>O)  $\delta$  102.94, 83.65, 81.87, 73.07, 72.04, 71.82, 69.12, 64.68, 60.29, 54.15, 52.29, 49.39, 46.97, 46.32, 38.19. FT-IR: (KBr, cm<sup>-1</sup>):  $\nu$  3377, 2928, 1639, 1570, 1155, 1080, 1032, 945, 580. ESI-MS (*m/z*): 1341.52 (Calcd.) and 1306.55 (Found) for [M - Cl]<sup>+</sup>

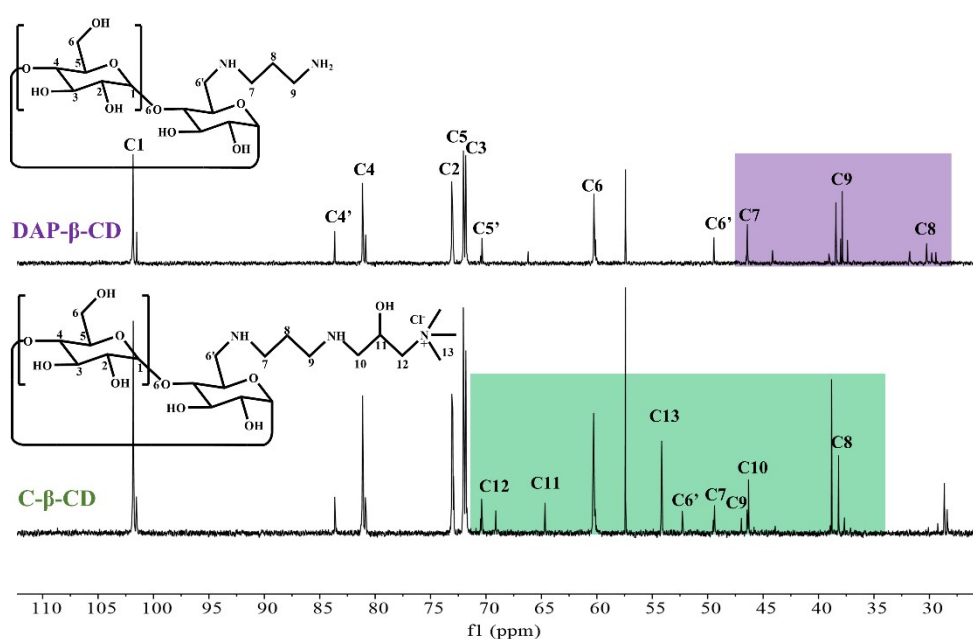

Figure S1 <sup>13</sup>C-NMR spectrum of DAP- $\beta$ -CD and C- $\beta$ -CD.

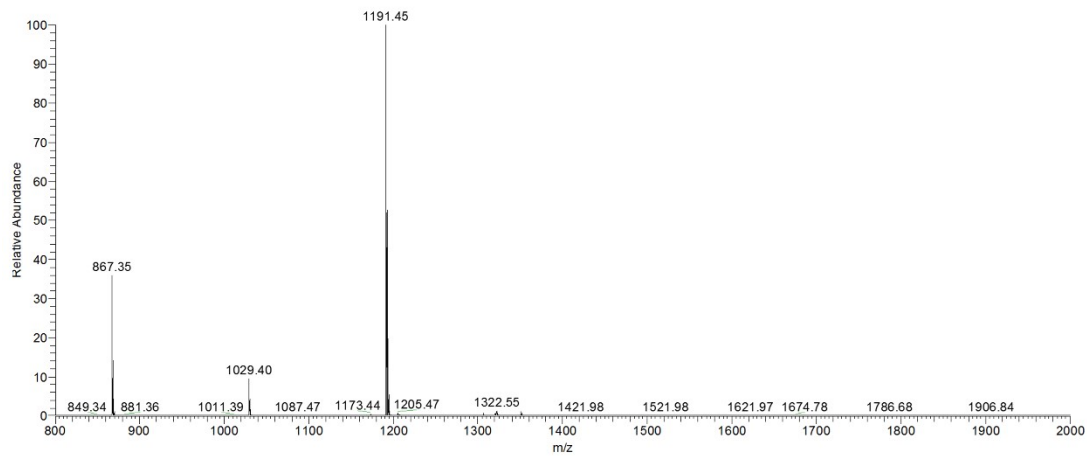

**Figure S2** Mass spectrum of DAP-β-CD.

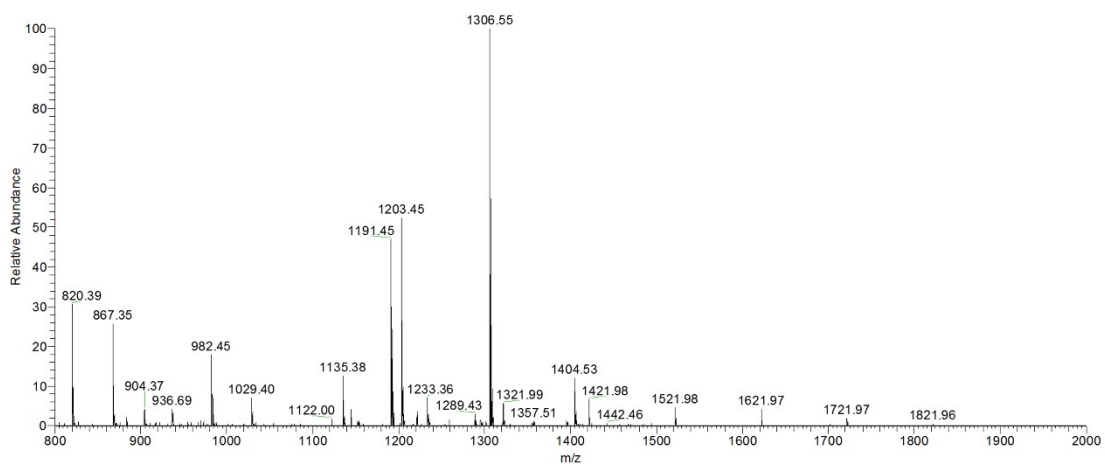

**Figure S3** Mass spectrum of C-β-CD.

**References:**

1. J. Stadermann, H. Komber, M. Erber, F. Däbritz, H. Ritter and B. Voit, *Macromolecules*, 2011, 44, 3250–3259.
2. P. Jiao, H. Zhou, M. Otto, Q. Mu, L. Li, G. Su, Y. Zhang, E. R. Butch, S. E. Snyder, G. Jiang and B. Yan, *J. Am. Chem. Soc.*, 2011, 133, 13918–13921.
